# Supplementary material
Source: publisher figshare collection journal article supplement (https://acs.figshare.com/ndownloader/files/4580533)
Supplement: Supplementary file 1 [file 4580533]

## Supporting information for

### Halide-stabilized LiBH<sub>4</sub>, a room-temperature lithium fast-ion conductor

Hideki Maekawa, Motoaki Matsuo, Hitoshi Takamura, Mariko Ando, Yasuto Noda,  
Taiki Karahashi and Shin-ichi Orimo

#### **SYNTHESIS**

Starting materials: LiBH<sub>4</sub> (Aldrich, 90%), LiCl (Aldrich, 99.999%), LiBr (Aldrich, 99.999%), and LiI (Aldrich, 99.999%), were used as received. After grinding the appropriate amounts of the powders in an Argon-filled glove box, the powders were pressed into pellets and placed in a Pyrex glass with a plastic screw valve and calcined below 300°C under vacuum for several hours. After the preheating, samples were heated at desired temperatures under either hydrogen or argon atmosphere for 4~12 hrs.

#### **CHARACTERIZATION**

X-ray diffraction measurement (Cu K<sub>α</sub>) for the composite sample was performed by polyimide film cell to avoid hydration from humidity. Temperature dependence of the conductivity was observed from the complex ac impedance spectrum by use of either Solartron 1260 or an HP4192A impedance meter with a homemade conductivity cell. <sup>1</sup>H and <sup>7</sup>Li NMR spectra were obtained by a Chemagnetics CMX-300 spectrometer operated at 300 and 121 MHz under a field of 7 T, equipped with a high-temperature probe. Samples were packed into 5 mmϕ sealed glass tubes. Peak separation and integration of the NMR spectra were performed by the Dmfit program.<sup>1</sup>

1. D. Massiot, et al., Modelling one- and two-dimensional solid-state NMR spectra. *Magn. Reson. Chem.* **40** 70-76 (2002)

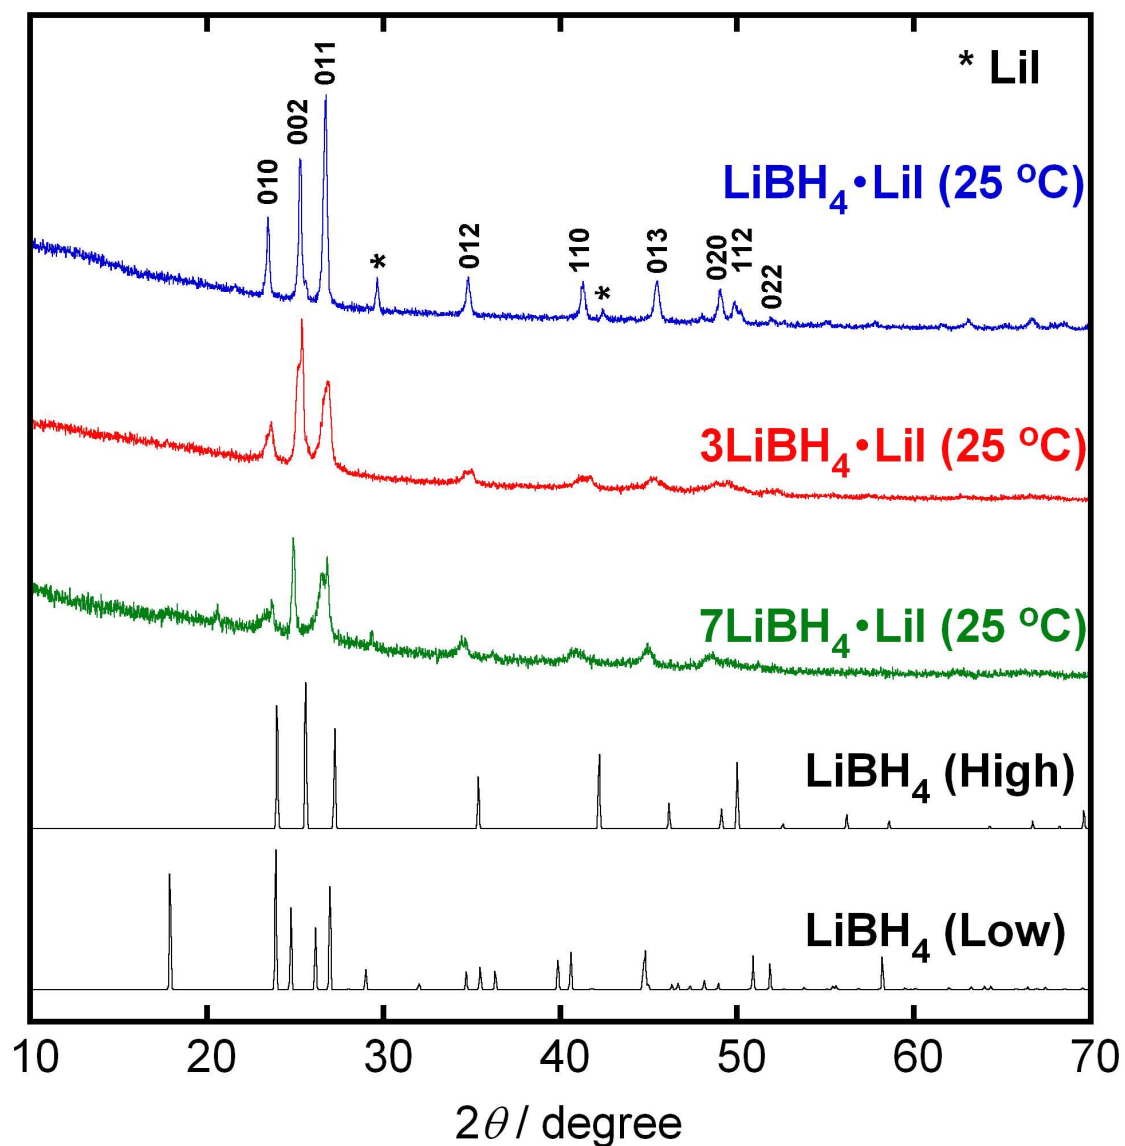

Figure 1. (a) Cu  $K_{\alpha}$  XRD patterns of  $\text{LiBH}_4$  and  $\text{LiBH}_4\text{-LiI}$  binary. Calculated patterns for low- and high-temperature forms of  $\text{LiBH}_4$  and the measured patterns for  $7\text{LiBH}_4\cdot\text{LiI}$ ,  $3\text{LiBH}_4\cdot\text{LiI}$ , and  $\text{LiBH}_4\cdot\text{LiI}$  at  $25^\circ\text{C}$  are shown, respectively. Peak indices for  $\text{LiBH}_4\cdot\text{LiI}$  are from the crystal data of high-temperature hexagonal phase of  $\text{LiBH}_4$ ,  $\text{LiBH}_4(\text{High})$ .

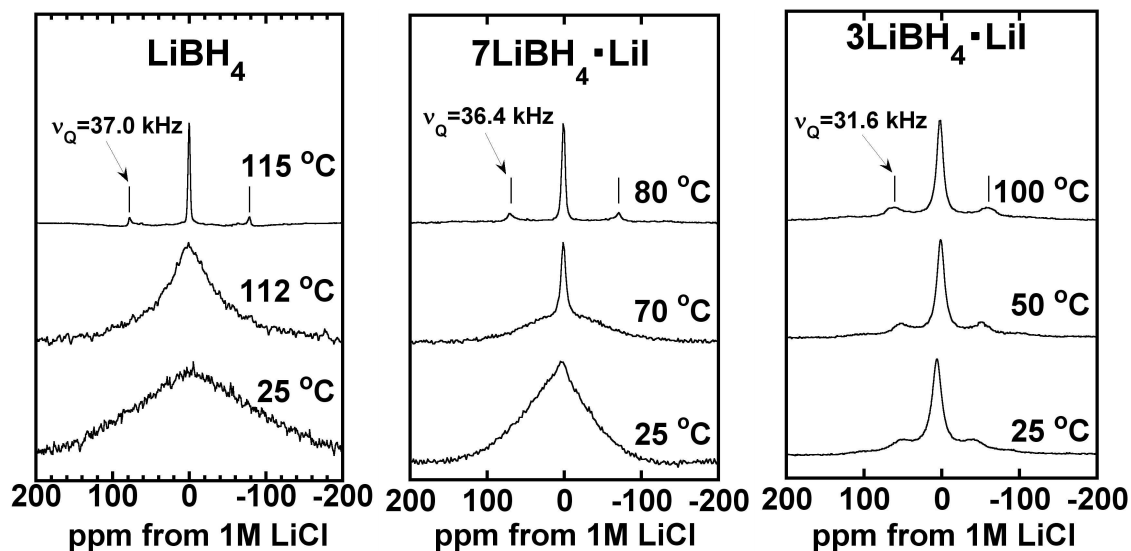

Figure 2. Temperature variation of  $^7\text{Li}$  NMR spectra for  $\text{LiBH}_4$ ,  $7\text{LiBH}_4 \cdot \text{LiI}$ , and  $3\text{LiBH}_4 \cdot \text{LiI}$ , respectively. A split by a first-order nuclear-quadrupole interaction is indexed in the figure. Simulation assuming 1<sup>st</sup> order quadrupole interaction yielded  $\nu_Q = e^2 q Q / h = 37.0 \text{ kHz}$  ( $\eta = 0$ ),  $36.4 \text{ kHz}$  ( $\eta = 0$ ), and  $31.6 \text{ kHz}$  ( $\eta = 0$ ) for  $\text{LiBH}_4$ ,  $7\text{LiBH}_4 \cdot \text{LiI}$ , and  $3\text{LiBH}_4 \cdot \text{LiI}$ , respectively.
